# Supplementary material for: Morphological and mechanical studies of Al 2 O 3 –Na 2 SiO 3 as a skin barrier coated with TiO 2 for carbon fiber reinforced composite materials
Source: Royal Society of Chemistry journal article supplement (doi:10.1039/d3ra08518j), 2024-01-01
Supplement: d3ra08518j1.pdf [file d3ra08518j1.pdf]

## Supplementary Information for Morphological and Mechanical Studies of Al<sub>2</sub>O<sub>3</sub>-Na<sub>2</sub>SiO<sub>3</sub> as Skin Barrier Coated with TiO<sub>2</sub> for Carbon Fiber Reinforced Composite Materials

Widyastuti<sup>\*a</sup>, Serly Hardiyanti<sup>a</sup>, Wafiq Syeach Muhaqqi Al Haq<sup>a</sup>, Liyana Labiba Zulfa<sup>b</sup>, Adhy Prihatmiko Wibowo<sup>a</sup>, Lilis Mariani<sup>c</sup>, Herry Purnomo<sup>c</sup>, Sulistijono<sup>a</sup>, Ruri Agung Wahyuono<sup>d</sup>, Rindang Fajarin<sup>a</sup>

<sup>a</sup> Department of Materials and Metallurgical Engineering, Faculty of Industrial Technology and Systems Engineering, Institut Teknologi Sepuluh Nopember, Jl. Arif Rahman Hakim, Kampus ITS Keputih-Sukolilo, Surabaya 60111, Indonesia, e-mail:wiwid@mat-eng.its.ac.id

<sup>b</sup> Department of Chemistry, Faculty of Science and Data Analytics, Institut Teknologi Sepuluh Nopember, Jl. Arif Rahman Hakim, Kampus ITS Keputih-Sukolilo, Surabaya 60111, Indonesia

<sup>c</sup> National Research and Innovation Agency, Tangerang 15314, Indonesia

<sup>d</sup> Department of Engineering Physics, Faculty of Industrial Technology and Systems Engineering, Institut Teknologi Sepuluh Nopember, Jl. Arif Rahman Hakim, Kampus ITS Keputih-Sukolilo, Surabaya 60111, Indonesia

1. Calculation of Standard Deviation of Adhesive Strength Results resulting from mass fraction variation and hot pressing temperature

| Descriptive Statistics                |               |       |                |    |
|---------------------------------------|---------------|-------|----------------|----|
| Dependent Variable: Adhesive strength |               |       |                |    |
| Temperature                           | Mass fraction | Mean  | Std. Deviation | N  |
| 100                                   | 2.5           | .7333 | .07506         | 3  |
|                                       | 2.75          | .7967 | .07767         | 3  |
|                                       | 3             | .6400 | .09000         | 3  |
|                                       | Total         | .7233 | .09798         | 9  |
| 130                                   | 2.5           | .5667 | .10786         | 3  |
|                                       | 2.75          | .7800 | .14000         | 3  |
|                                       | 3             | .5233 | .08505         | 3  |
|                                       | Total         | .6233 | .15419         | 9  |
| 160                                   | 2.5           | .5067 | .02887         | 3  |
|                                       | 2.75          | .7933 | .10970         | 3  |
|                                       | 3             | .5333 | .05508         | 3  |
|                                       | Total         | .6111 | .15095         | 9  |
| Total                                 | 2.5           | .6022 | .12194         | 9  |
|                                       | 2.75          | .7900 | .09734         | 9  |
|                                       | 3             | .5656 | .08791         | 9  |
|                                       | Total         | .6526 | .14108         | 27 |

2. Standard Deviation of Adhesive Strength Results with Pivot Distance Variation
  - a. Pull off test failure

| Variation (mm) | Adhesive strength (MPa) | Mean (MPa) | Standard deviation |
|----------------|-------------------------|------------|--------------------|
|----------------|-------------------------|------------|--------------------|

|     | Data 1 | Data 2 | Data 3 |      |       |
|-----|--------|--------|--------|------|-------|
| 120 | 0.74   | 0.63   | 0.66   | 0.68 | 0.057 |
| 150 | 0.64   | 0.74   | 0.77   | 0.72 | 0.068 |
| 180 | 0.73   | 0.81   | 0.66   | 0.73 | 0.075 |

b. Adhesive fracture

| Variation<br>(mm) | Adhesive fracture area (%) |        |        | Mean (%) | Standard<br>deviation |
|-------------------|----------------------------|--------|--------|----------|-----------------------|
|                   | Data 1                     | Data 2 | Data 3 |          |                       |
| 120               | 0.495                      | 0.501  | 0.110  | 0.369    | 0.224                 |
| 150               | 26.781                     | 33.063 | 4.980  | 21.608   | 14.739                |
| 180               | 37.347                     | 47.703 | 45.314 | 43.455   | 5.423                 |
